# Supplementary material for: 12CO2 transition frequencies with kHz-accuracy by saturation spectroscopy in the 1.99–2.09 μm region
Source: Royal Society of Chemistry journal article supplement (doi:10.1039/d3cp01603j), 2023-01-01
Supplement: d3cp01603j1.pdf [file d3cp01603j1.pdf]

SupMat without 636 transitions.txt

07/04/2023

\*\*\*\*\*  
All frequencies and uncertainties are given in kHz.  
Meas. freq.: Frequencies measured in this work. They are reported with their 1-sigma uncertainty UncMeas.  
Calc. freq.: Frequencies calculated from the effective Hamiltonian constants fitted in this work for the 20013  
and 20012 states (given below) and from the effective Hamiltonian constants given in Table 2 of  
Wu2020 for the ground state. Frequencies marked with \* are calculated with the experimental value  
of the upper energy level.  
Cal-Meas. : Calc. freq.-Meas. freq.  
Rec. freq. : Frequencies that are recommended to be used.  
Unc. : 1-sigma uncertainty of the recommended frequencies.

\*\*\*\*\*  
Effective Hamiltonian constants in MHz

State 20012

|                     | Value               | Unc.        |
|---------------------|---------------------|-------------|
| G                   | 1.492317285961E+08  | 4.87117E-04 |
| B                   | 1.158798150755E+04  | 6.38182E-06 |
| D                   | 4.080361306835E-03  | 2.23925E-08 |
| H                   | 2.187291242079E-08  | 3.24045E-11 |
| L                   | 1.448393706292E-13  | 2.31815E-14 |
| M                   | 1.384541996722E-16  | 8.66453E-18 |
| N                   | -2.122605726631E-20 | 1.61851E-21 |
| O                   | 3.097547539876E-24  | 1.19073E-25 |
| Nfit/Nmeas          | 54/63               |             |
| J"max               | 74                  |             |
| RMS of the fit (Hz) | 1100                |             |

State 20013

|                     | Value               | Unc.        |
|---------------------|---------------------|-------------|
| G                   | 1.455079611574E+08  | 3.44628E-04 |
| B                   | 1.163787718148E+04  | 3.79995E-06 |
| D                   | 5.451340885814E-03  | 1.01443E-08 |
| H                   | 1.817775758405E-08  | 1.06746E-11 |
| L                   | -3.178611468350E-14 | 5.1997E-15  |
| M                   | -2.460270770993E-17 | 1.17745E-18 |
| N                   | 9.771626705837E-22  | 1.00257E-22 |
| Nfit/Nmeas          | 40/44               |             |
| J"max               | 70                  |             |
| RMS of the fit (Hz) | 808                 |             |

Wu2020: Wu H, Hu C-L, Wang J, Sun YR, Tan Y, Liu A-W, Hu S-M. A well-isolated vibrational state of CO<sub>2</sub> verified by near-infrared saturated spectroscopy with kHz accuracy. Phys Chem Chem Phys 2020;22:2841-2848. Doi: 10.1039/C9CP05121J

\*\*\*\*\*

20013-00001 band

| Assig. | Meas. freq.    | UncMeas | Calc. freq      | Cal-Meas | Rec. freq.     | Unc. |
|--------|----------------|---------|-----------------|----------|----------------|------|
| P(70)  |                |         | 143551036296.4* |          | 143551036296.4 | 14.6 |
| P(68)  |                |         | 143617406813.3* |          | 143617406813.3 | 6.5  |
| P(66)  |                |         | 143683041703.1* |          | 143683041703.1 | 7.7  |
| P(64)  |                |         | 143747954381.8  |          | 143747954381.8 | 3.2  |
| P(62)  |                |         | 143812158059.4  |          | 143812158059.4 | 3.2  |
| P(60)  |                |         | 143875665697.1  |          | 143875665697.1 | 3.2  |
| P(58)  |                |         | 143938490004.9  |          | 143938490004.9 | 3.2  |
| P(56)  |                |         | 144000643426.9  |          | 144000643426.9 | 3.2  |
| P(54)  |                |         | 144062138129.1  |          | 144062138129.1 | 3.1  |
| P(52)  |                |         | 144122985985.2  |          | 144122985985.2 | 3.3  |
| P(50)  |                |         | 144183198562.5  |          | 144183198562.5 | 3.2  |
| P(48)  |                |         | 144242787108.0  |          | 144242787108.0 | 3.2  |
| P(46)  |                |         | 144301762533.8  |          | 144301762533.8 | 3.2  |
| P(44)  |                |         | 144360135402.7  |          | 144360135402.7 | 3.2  |
| P(42)  |                |         | 144417915913.1  |          | 144417915913.1 | 3.2  |
| P(40)  |                |         | 144475113885.4  |          | 144475113885.4 | 3.2  |
| P(38)  |                |         | 144531738746.9  |          | 144531738746.9 | 3.2  |
| P(36)  |                |         | 144587799518.3  |          | 144587799518.3 | 3.2  |
| P(34)  |                |         | 144643304799.6  |          | 144643304799.6 | 3.2  |
| P(32)  |                |         | 144698262757.2  |          | 144698262757.2 | 3.2  |
| P(30)  |                |         | 144752681110.6  |          | 144752681110.6 | 3.2  |
| P(28)  |                |         | 144806567120.6  |          | 144806567120.6 | 3.2  |
| P(26)  |                |         | 144859927577.1  |          | 144859927577.1 | 3.2  |
| P(24)  |                |         | 144912768788.5  |          | 144912768788.5 | 3.2  |
| P(22)  |                |         | 144965096570.8  |          | 144965096570.8 | 3.2  |
| P(20)  |                |         | 145016916238.1  |          | 145016916238.1 | 3.2  |
| P(18)  |                |         | 145068232593.8  |          | 145068232593.8 | 3.2  |
| P(16)  | 145119049920.6 | 3.0     | 145119049921.9  | 1.3      | 145119049921.9 | 3.2  |
| P(14)  | 145169371981.4 | 3.4     | 145169371980.1  | -1.3     | 145169371980.1 | 3.2  |
| P(12)  | 145219201993.0 | 3.5     | 145219201992.5  | -0.5     | 145219201992.5 | 3.2  |
| P(10)  | 145268542644.7 | 3.4     | 145268542644.3  | -0.4     | 145268542644.3 | 3.2  |
| P(8)   | 145317396075.5 | 3.6     | 145317396076.3  | 0.8      | 145317396076.3 | 3.2  |
| P(6)   | 145365763879.6 | 3.2     | 145365763880.8  | 1.2      | 145365763880.8 | 3.2  |
| P(4)   | 145413647096.5 | 3.1     | 145413647098.1  | 1.6      | 145413647098.1 | 3.2  |
| P(2)   | 145461046214.5 | 3.4     | 145461046213.9  | -0.6     | 145461046213.9 | 3.2  |
| R(0)   | 145531236890.1 | 3.4     | 145531236890.0  | -0.1     | 145531236890.0 | 3.2  |

|       |                |      |                |      |                |      |
|-------|----------------|------|----------------|------|----------------|------|
| R(2)  | 145577424223.3 | 3.1  | 145577424222.6 | -0.7 | 145577424222.6 | 3.2  |
| R(4)  | 145623124768.3 | 2.9  | 145623124766.6 | -1.7 | 145623124766.6 | 3.2  |
| R(6)  | 145668336501.3 | 3.0  | 145668336501.0 | -0.3 | 145668336501.0 | 3.2  |
| R(8)  | 145713056851.0 | 2.9  | 145713056850.1 | -0.9 | 145713056850.1 | 3.2  |
| R(10) | 145757282685.6 | 3.4  | 145757282686.2 | 0.6  | 145757282686.2 | 3.2  |
| R(12) | 145801010333.2 | 3.0  | 145801010333.3 | 0.1  | 145801010333.3 | 3.2  |
| R(14) | 145844235571.7 | 2.9  | 145844235571.2 | -0.5 | 145844235571.2 | 3.2  |
| R(16) | 145886953640.9 | 2.9  | 145886953640.7 | -0.2 | 145886953640.7 | 3.2  |
| R(18) | 145929159249.7 | 3.0  | 145929159249.5 | -0.2 | 145929159249.5 | 3.2  |
| R(20) | 145970846578.6 | 2.9  | 145970846578.6 | 0.0  | 145970846578.6 | 3.2  |
| R(22) | 146012009289.8 | 2.9  | 146012009290.4 | 0.6  | 146012009290.4 | 3.2  |
| R(24) | 146052640536.8 | 2.9  | 146052640536.5 | -0.3 | 146052640536.5 | 3.2  |
| R(26) | 146092732967.0 | 3.1  | 146092732966.7 | -0.3 | 146092732966.7 | 3.2  |
| R(28) | 146132278738.5 | 3.0  | 146132278739.0 | 0.5  | 146132278739.0 | 3.2  |
| R(30) | 146171269531.1 | 3.3  | 146171269529.7 | -1.4 | 146171269529.7 | 3.2  |
| R(32) | 146209696545.2 | 3.1  | 146209696545.1 | -0.1 | 146209696545.1 | 3.2  |
| R(34) | 146247550532.3 | 3.0  | 146247550532.4 | 0.1  | 146247550532.4 | 3.2  |
| R(36) | 146284821792.1 | 2.9  | 146284821792.6 | 0.5  | 146284821792.6 | 3.2  |
| R(38) | 146321500193.2 | 3.0  | 146321500193.5 | 0.3  | 146321500193.5 | 3.2  |
| R(40) | 146357575182.8 | 2.9  | 146357575182.3 | -0.5 | 146357575182.3 | 3.2  |
| R(42) | 146393035800.0 | 3.0  | 146393035800.1 | 0.1  | 146393035800.1 | 3.2  |
| R(44) | 146427870697.5 | 3.0  | 146427870695.4 | -2.1 | 146427870695.4 | 3.2  |
| R(46) | 146462068137.7 | 2.9  | 146462068138.8 | 1.1  | 146462068138.8 | 3.2  |
| R(48) | 146495616036.8 | 3.0  | 146495616037.3 | 0.5  | 146495616037.3 | 3.2  |
| R(50) | 146528501949.4 | 3.2  | 146528501948.7 | -0.7 | 146528501948.7 | 3.2  |
| R(52) | 146560713096.8 | 3.3  | 146560713096.7 | -0.1 | 146560713096.7 | 3.2  |
| R(54) | 146592236384.6 | 3.5  | 146592236384.7 | 0.1  | 146592236384.7 | 3.2  |
| R(56) | 146623058410.3 | 3.2  | 146623058410.6 | 0.3  | 146623058410.6 | 3.2  |
| R(58) | 146653165481.7 | 3.8  | 146653165480.5 | -1.2 | 146653165480.5 | 3.2  |
| R(60) | 146682543621.6 | 3.4  | 146682543622.5 | 0.9  | 146682543622.5 | 3.2  |
| R(62) | 146711178600.3 | 3.4  | 146711178599.9 | -0.4 | 146711178599.9 | 3.2  |
| R(64) | 146739055925.1 | 7.7  |                |      | 146739055925.1 | 7.7  |
| R(66) | 146766160861.4 | 6.5  |                |      | 146766160861.4 | 6.5  |
| R(68) | 146792478469.7 | 14.6 |                |      | 146792478469.7 | 14.6 |

\*\*\*\*\*

20012-00001 band

| Assig. | Meas. freq.    | UncMeas | Calc. freq | Cal-Meas | Rec. freq.     | Unc. |
|--------|----------------|---------|------------|----------|----------------|------|
| P(74)  | 146911623361.5 | 8.7     |            |          | 146911623361.5 | 8.7  |
| P(72)  | 146989515840.3 | 4.0     |            |          | 146989515840.3 | 4.0  |
| P(70)  | 147066640733.3 | 3.5     |            |          | 147066640733.3 | 3.5  |
| P(68)  | 147142980565.8 | 3.5     |            |          | 147142980565.8 | 3.5  |
| P(66)  | 147218521294.3 | 3.4     |            |          | 147218521294.3 | 3.4  |

|       |                |     |                |       |                |     |
|-------|----------------|-----|----------------|-------|----------------|-----|
| P(64) | 147293251422.9 | 3.7 | 147293251423.0 | 0.1   | 147293251423.0 | 3.2 |
| P(62) | 147367161400.9 | 3.3 | 147367161402.0 | 1.1   | 147367161402.0 | 3.2 |
| P(60) | 147440243211.6 | 3.3 | 147440243210.7 | -0.9  | 147440243210.7 | 3.2 |
| P(58) | 147512490048.1 | 3.3 | 147512490047.3 | -0.8  | 147512490047.3 | 3.2 |
| P(56) | 147583896096.4 | 3.3 | 147583896095.9 | -0.5  | 147583896095.9 | 3.2 |
| P(54) | 147654456358.4 | 3.3 | 147654456358.3 | -0.1  | 147654456358.3 | 3.2 |
| P(52) | 147724166519.3 | 3.0 | 147724166519.9 | 0.6   | 147724166519.9 | 3.2 |
| P(50) | 147793022842.6 | 3.1 | 147793022843.2 | 0.6   | 147793022843.2 | 3.2 |
| P(48) | 147861022080.7 | 3.0 | 147861022082.0 | 1.3   | 147861022082.0 | 3.2 |
| P(46) | 147928161407.1 | 3.1 | 147928161410.7 | 3.6   | 147928161407.1 | 3.1 |
| P(44) | 147994438380.1 | 3.3 | 147994438365.6 | -14.5 | 147994438380.1 | 3.3 |
| P(42) | 148059850796.9 | 3.0 | 148059850795.5 | -1.4  | 148059850795.5 | 3.2 |
| P(40) | 148124396819.3 | 2.9 | 148124396819.2 | -0.1  | 148124396819.2 | 3.2 |
| P(38) | 148188074787.2 | 2.9 | 148188074788.6 | 1.4   | 148188074788.6 | 3.2 |
| P(36) | 148250883255.1 | 2.8 | 148250883256.5 | 1.4   | 148250883256.5 | 3.2 |
| P(34) | 148312820947.2 | 2.9 | 148312820948.2 | 1.0   | 148312820948.2 | 3.2 |
| P(32) | 148373886735.5 | 2.9 | 148373886735.6 | 0.1   | 148373886735.6 | 3.2 |
| P(30) | 148434079613.5 | 2.9 | 148434079614.7 | 1.2   | 148434079614.7 | 3.2 |
| P(28) | 148493398682.7 | 3.9 | 148493398684.8 | 2.1   | 148493398684.8 | 3.2 |
| P(26) | 148551843131.1 | 2.9 | 148551843130.4 | -0.7  | 148551843130.4 | 3.2 |
| P(24) | 148609412204.0 | 3.0 | 148609412203.9 | -0.1  | 148609412203.9 | 3.2 |
| P(22) | 148666105210.8 | 3.1 | 148666105211.2 | 0.4   | 148666105211.2 | 3.2 |
| P(20) | 148721921498.3 | 3.0 | 148721921497.9 | -0.4  | 148721921497.9 | 3.2 |
| P(18) | 148776860436.3 | 3.0 | 148776860437.2 | 0.9   | 148776860437.2 | 3.2 |
| P(16) | 148830921417.8 | 3.0 | 148830921419.1 | 1.3   | 148830921419.1 | 3.2 |
| P(14) | 148884103839.8 | 3.2 | 148884103841.0 | 1.2   | 148884103841.0 | 3.2 |
| P(12) | 148936407097.7 | 3.1 | 148936407098.8 | 1.1   | 148936407098.8 | 3.2 |
| P(10) | 148987830579.6 | 3.6 | 148987830580.0 | 0.4   | 148987830580.0 | 3.2 |
| P(8)  | 149038373657.5 | 2.9 | 149038373657.3 | -0.2  | 149038373657.3 | 3.2 |
| P(6)  | 149088035683.0 | 2.9 | 149088035683.3 | 0.3   | 149088035683.3 | 3.2 |
| P(4)  | 149136815987.3 | 2.9 | 149136815986.2 | -1.1  | 149136815986.2 | 3.2 |
| P(2)  | 149184713867.3 | 3.0 | 149184713866.8 | -0.5  | 149184713866.8 | 3.2 |
| R(0)  | 149254904543.6 | 3.1 | 149254904542.8 | -0.8  | 149254904542.8 | 3.2 |
| R(2)  | 149300593110.5 | 2.9 | 149300593110.6 | 0.1   | 149300593110.6 | 3.2 |
| R(4)  | 149345396570.0 | 2.9 | 149345396569.1 | -0.9  | 149345396569.1 | 3.2 |
| R(6)  | 149389314083.5 | 2.9 | 149389314082.0 | -1.5  | 149389314082.0 | 3.2 |
| R(8)  | 149432344784.5 | 3.1 | 149432344785.8 | 1.3   | 149432344785.8 | 3.2 |
| R(10) | 149474487792.4 | 3.1 | 149474487792.4 | 0.0   | 149474487792.4 | 3.2 |
| R(12) | 149515742194.7 | 3.0 | 149515742194.1 | -0.6  | 149515742194.1 | 3.2 |
| R(14) | 149556107069.8 | 3.2 | 149556107068.4 | -1.4  | 149556107068.4 | 3.2 |
| R(16) | 149595581482.8 | 3.1 | 149595581484.1 | 1.3   | 149595581484.1 | 3.2 |
| R(18) | 149634164511.2 | 3.0 | 149634164509.2 | -2.0  | 149634164509.2 | 3.2 |
| R(20) | 149671855220.4 | 3.1 | 149671855219.0 | -1.4  | 149671855219.0 | 3.2 |
| R(22) | 149708652707.4 | 2.9 | 149708652705.8 | -1.6  | 149708652705.8 | 3.2 |
| R(24) | 149744556091.7 | 3.1 | 149744556089.7 | -2.0  | 149744556089.7 | 3.2 |

|       |                |     |                 |       |                |     |
|-------|----------------|-----|-----------------|-------|----------------|-----|
| R(26) | 149779564532.6 | 3.2 | 149779564531.0  | -1.6  | 149779564531.0 | 3.2 |
| R(28) | 149813677243.6 | 3.1 | 149813677243.1  | -0.5  | 149813677243.1 | 3.2 |
| R(30) | 149846893508.5 | 3.1 | 149846893508.2  | -0.3  | 149846893508.2 | 3.2 |
| R(32) | 149879212692.8 | 3.0 | 149879212693.7  | 0.9   | 149879212693.7 | 3.2 |
| R(34) | 149910634270.4 | 3.0 | 149910634270.6  | 0.2   | 149910634270.6 | 3.2 |
| R(36) | 149941157834.1 | 3.3 | 149941157834.3  | 0.2   | 149941157834.3 | 3.2 |
| R(38) | 149970783128.6 | 3.1 | 149970783127.3  | -1.3  | 149970783127.3 | 3.2 |
| R(40) | 149999510067.7 | 3.2 | 149999510064.7  | -3.0  | 149999510064.7 | 3.2 |
| R(42) | 150027338777.9 | 3.2 | 150027338763.0  | -14.9 | 150027338777.9 | 3.2 |
| R(44) | 150054269570.1 | 3.2 | 150054269572.3  | 2.2   | 150054269570.1 | 3.2 |
| R(46) | 150080303113.5 | 3.3 | 150080303112.8  | -0.7  | 150080303112.8 | 3.2 |
| R(48) | 150105440317.6 | 3.1 | 150105440318.0  | 0.4   | 150105440318.0 | 3.2 |
| R(50) | 150129682483.6 | 3.2 | 150129682483.4  | -0.2  | 150129682483.4 | 3.2 |
| R(52) |                |     | 150153031325.9  |       | 150153031325.9 | 3.2 |
| R(54) |                |     | 150175489053.7  |       | 150175489053.7 | 3.2 |
| R(56) |                |     | 150197058453.0  |       | 150197058453.0 | 3.2 |
| R(58) |                |     | 150217742994.1  |       | 150217742994.1 | 3.2 |
| R(60) |                |     | 150237546965.1  |       | 150237546965.1 | 3.2 |
| R(62) |                |     | 150256475641.1  |       | 150256475641.1 | 3.2 |
| R(64) |                |     | 150274535516.2* |       | 150274535516.2 | 3.4 |
| R(66) |                |     | 150291734614.4* |       | 150291734614.4 | 3.5 |
| R(68) |                |     | 150308082906.4* |       | 150308082906.4 | 3.5 |
| R(70) |                |     | 150323592911.2* |       | 150323592911.2 | 4.0 |
| R(72) |                |     | 150338280579.2* |       | 150338280579.2 | 8.7 |

\*\*\*\*\*

20012-00001 band of 12C18O16O

| Assig. | Meas. freq.    | UncMeas | Calc. freq | Cal-Meas | Rec. freq.     | Unc. |
|--------|----------------|---------|------------|----------|----------------|------|
| R(11)  | 147293250931.5 | 3.7     |            |          | 147293250931.5 | 3.7  |
| P(12)  | 146765882700.7 | 3.7     |            |          | 146765882700.7 | 3.7  |
